# Supplementary material for: High-entropy configuration of O3-type layered transition-metal oxide cathode with high-voltage stability for sodium-ion batteries
Source: Royal Society of Chemistry journal article supplement (doi:10.1039/d4ta04371e), 2024-01-01
Supplement: d4ta04371e1.pdf [file d4ta04371e1.pdf]

## Supplementary Material

### High-entropy configuration of O3-type layered transition-metal oxide cathode with high-voltage stability for sodium-ion batteries†

*Lei Liu*<sup>a</sup>, *Yuhang Xin*<sup>a</sup>, *Yingshuai Wang*<sup>a</sup>, *Xiangyu Ding*<sup>a</sup>, *Qingbo Zhou*<sup>a</sup>, *Ziye Wang*<sup>a</sup>, *Weiqing Huang*<sup>b\*</sup>, *Hongcai Gao*<sup>a,c,d\*</sup>

<sup>a</sup>School of Materials Science and Engineering, Beijing Institute of Technology, Beijing 100081, P.R. China

<sup>b</sup>School of Mechanical Engineering, Beijing Institute of Technology, Beijing 100081, P.R. China

<sup>c</sup>Yangtze Delta Region Academy of Beijing Institute of Technology, Jiaxing, 314019, China

<sup>d</sup>Beijing Institute of Technology Chongqing Innovation Center, Chongqing 401120, P.R. China

† Electronic supplementary information (ESI) available.

Corresponding author: [gaohc@bit.edu.cn](mailto:gaohc@bit.edu.cn) (Prof. Hongcai Gao) [hwq@bit.edu.cn](mailto:hwq@bit.edu.cn) (Prof. Weiqing Huang)

**TableS1** Crystallographic data obtained from Rietveld Refinements of NFM, NFMT, NFMS and NFMTS.

|       | a (Å)  | b (Å)  | c (Å)   | V (Å <sup>3</sup> ) | Na-O (Å) | TM-O (Å) | d <sub>(101)</sub> |
|-------|--------|--------|---------|---------------------|----------|----------|--------------------|
| NFM   | 2.9718 | 2.9718 | 16.2428 | 124.2320            | 2.37199  | 2.02171  | 2.53919            |
| NFMT  | 2.9729 | 2.9729 | 16.0686 | 122.9965            | 2.30812  | 2.05776  | 2.54225            |
| NFMS  | 2.9661 | 2.9661 | 16.1570 | 123.1039            | 2.36365  | 2.01595  | 2.53431            |
| NFMTS | 2.9716 | 2.9716 | 16.2421 | 124.2091            | 2.39485  | 2.00426  | 2.54167            |

**TableS2** Atom occupancy parameters obtained from Rietveld Refinements of NFM, NFMT, NFMS and NFMTS.

| Chemic | Measured atomic |        |         |         |        |         |        |
|--------|-----------------|--------|---------|---------|--------|---------|--------|
|        | Na              | Mn     | Fe      | Ni      | Ti     | Sb      | O      |
| NFM    | 1.00000         | 0.3999 | 0.20005 | 0.39998 | 0.0000 | 0.00000 | 1.0000 |
| NFMT   | 1.00000         | 0.3000 | 0.20005 | 0.39998 | 0.0999 | 0.00000 | 1.0000 |
| NFMS   | 1.00000         | 0.3999 | 0.20005 | 0.35005 | 0.0000 | 0.05004 | 1.0000 |
| NFMTS  | 1.00000         | 0.3000 | 0.20005 | 0.35005 | 0.0999 | 0.05004 | 1.0000 |

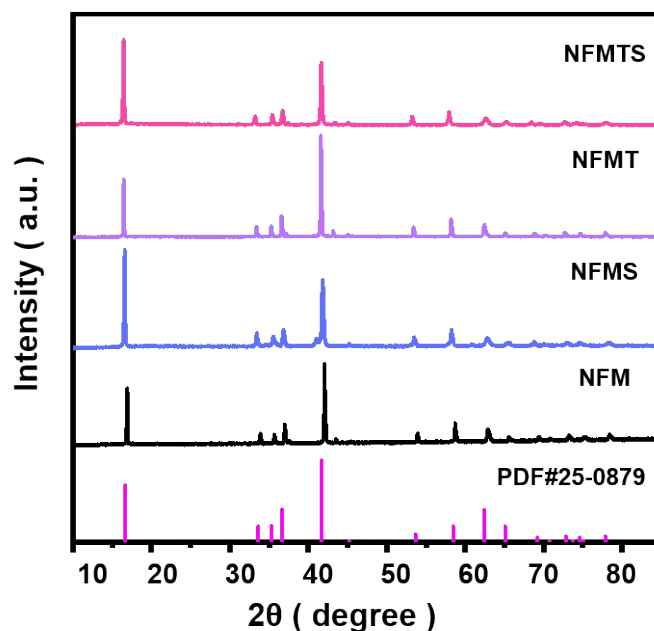

**Figure S1** XRD pattern of NFM, NFMS, NFMT and NFMTS

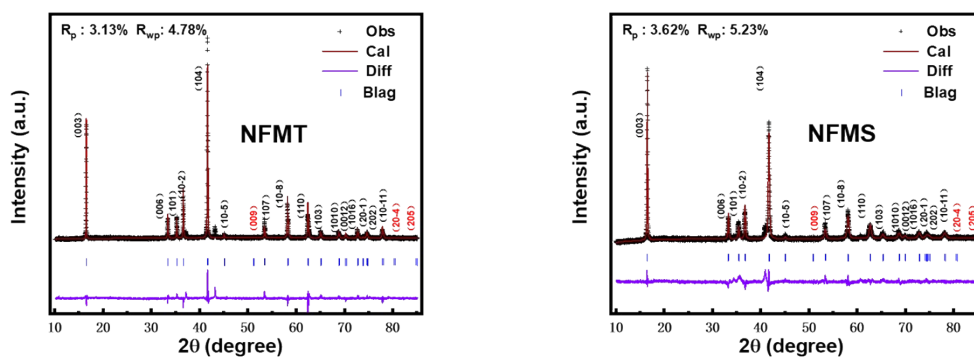

Figure S2 XRD pattern and Rietveld refinement profile of NFMT and NFMS

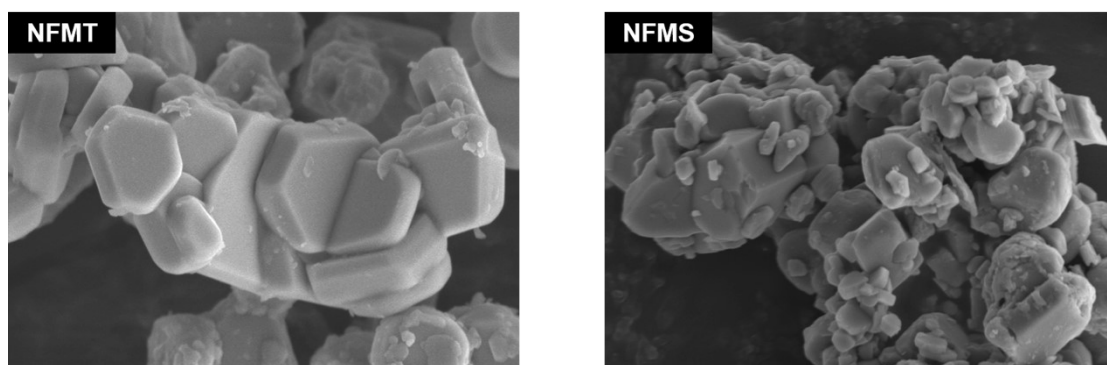

Figure S3 SEM images of NFMT and NFMS

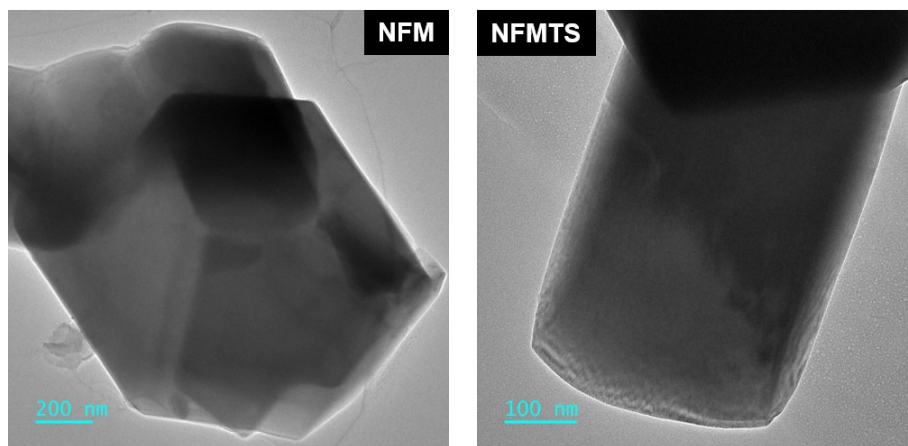

Figure S4. TEM images of NFM and NFMTS

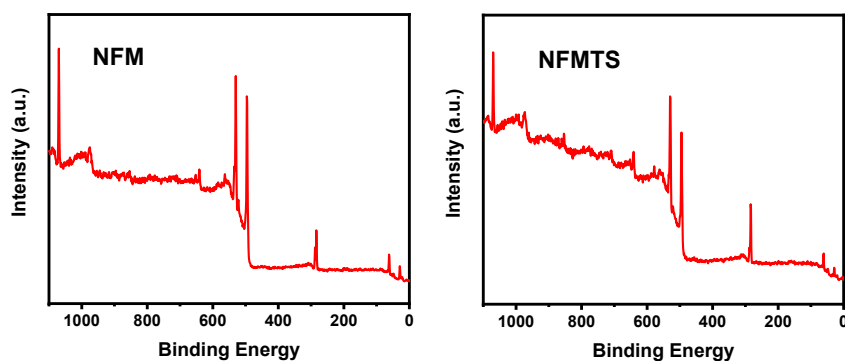

**Figure S5.** XPS spectrum of NFM and NFMTS

**TableS3** Cycle performance of NFM, NFMT, NFMS and NFMTS.

|                                                                | NFM          | NFMT         | NFMS         | NFMTS        |
|----------------------------------------------------------------|--------------|--------------|--------------|--------------|
| <b>Initial specific capacity (mAh·g<sup>-1</sup>)</b>          | <b>134.4</b> | <b>144.4</b> | <b>109.9</b> | <b>122.0</b> |
| <b>Specific capacity after 200 cycles (mAh·g<sup>-1</sup>)</b> | <b>63.4</b>  | <b>71.7</b>  | <b>64.2</b>  | <b>92.5</b>  |
| <b>Capacity retention (%)</b>                                  | <b>47.2</b>  | <b>49.6</b>  | <b>58.5</b>  | <b>76.0</b>  |

**TableS4** The comparative specific capacity of previously reported various modified NFM electrodes and NFMTS.

|                                                                                                                                                                              | Discharge specific capacity at 0.1C (mAh·g <sup>-1</sup> ) | Workin g Voltage (V) | References       |
|------------------------------------------------------------------------------------------------------------------------------------------------------------------------------|------------------------------------------------------------|----------------------|------------------|
| <b>NaNi<sub>0.35</sub>Fe<sub>0.2</sub>Mn<sub>0.3</sub>Ti<sub>0.1</sub>Sb<sub>0.05</sub>O<sub>2</sub></b>                                                                     | <b>217.2</b>                                               | <b>1.7-4.3</b>       | <b>This work</b> |
| <b>NaNi<sub>1/3</sub>Fe<sub>1/3</sub>Mn<sub>1/3</sub>O<sub>2</sub></b>                                                                                                       | <b>160</b>                                                 | <b>1.9-4.2</b>       | <b>44</b>        |
| <b>NaLi<sub>0.05</sub>(Ni<sub>0.25</sub>Fe<sub>0.5</sub>Mn<sub>0.25</sub>)<sub>0.95</sub>O<sub>2</sub></b>                                                                   | <b>177</b>                                                 | <b>1.7-4.4</b>       | <b>43</b>        |
| <b>NaNi<sub>0.32</sub>Fe<sub>0.32</sub>Mn<sub>0.32</sub>Al<sub>0.02</sub>Cu<sub>0.02</sub>O<sub>2</sub></b>                                                                  | <b>140</b>                                                 | <b>2.0-4.0</b>       | <b>45</b>        |
| <b>NaNi<sub>0.2</sub>Fe<sub>0.2</sub>Mn<sub>0.2</sub>Co<sub>0.2</sub>Ti<sub>0.2</sub>O<sub>2</sub></b>                                                                       | <b>180</b>                                                 | <b>1.5-4.2</b>       | <b>46</b>        |
| <b>Na<sub>0.95</sub>Ni<sub>1/3</sub>Fe<sub>1/3</sub>Mn<sub>1/3</sub>O<sub>2</sub></b>                                                                                        | <b>133.3</b>                                               | <b>2.0-4.0</b>       | <b>44</b>        |
| <b>NaNi<sub>0.12</sub>Cu<sub>0.12</sub>Mg<sub>0.12</sub>Fe<sub>0.15</sub>Mn<sub>0.1</sub>Co<sub>0.15</sub>Ti<sub>0.1</sub>Sn<sub>0.1</sub>Sb<sub>0.04</sub>O<sub>2</sub></b> | <b>110</b>                                                 | <b>2.0-3.9</b>       | <b>31</b>        |
| <b>NaNi<sub>0.2</sub>Fe<sub>0.2</sub>Mn<sub>0.2</sub>Co<sub>0.2</sub>O<sub>2</sub></b>                                                                                       | <b>177</b>                                                 | <b>1.9-4.3</b>       | <b>47</b>        |

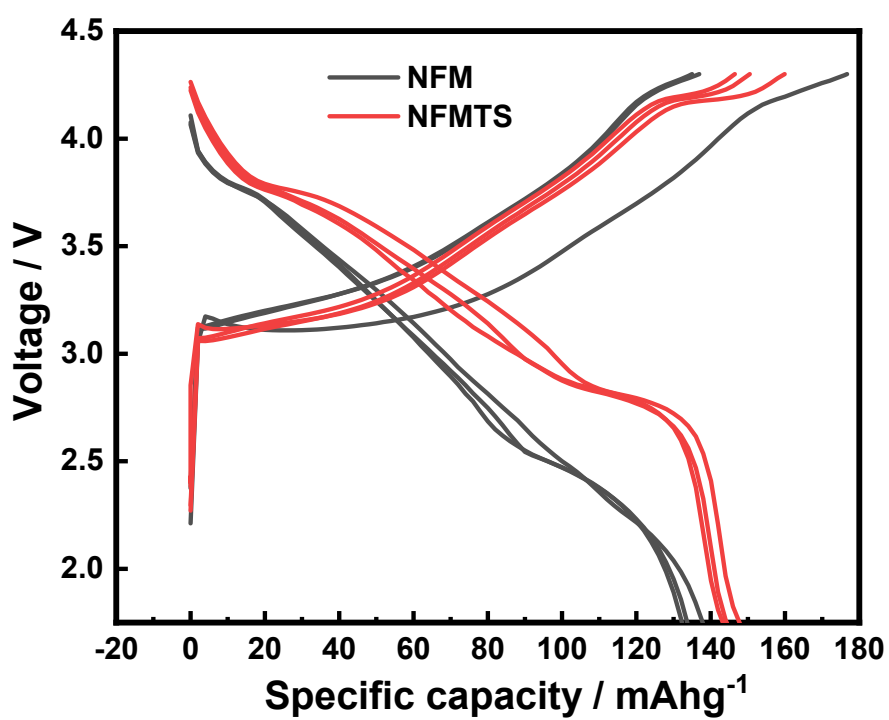

**Figure S6.** The charge and discharge curves of NFM and NFMTS cathodes at high voltage ranges of 1.7-4.3 V.

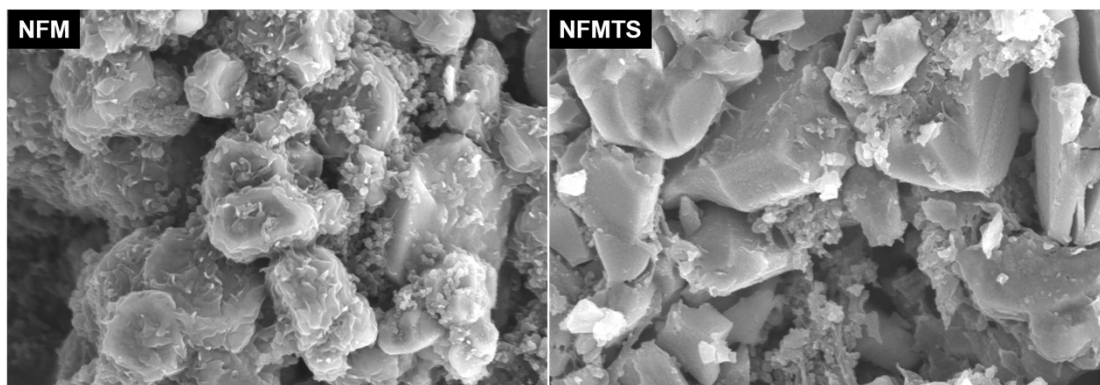

**Figure S7.** SEM images of NFM and NFMTS cathodes after 20 cycles

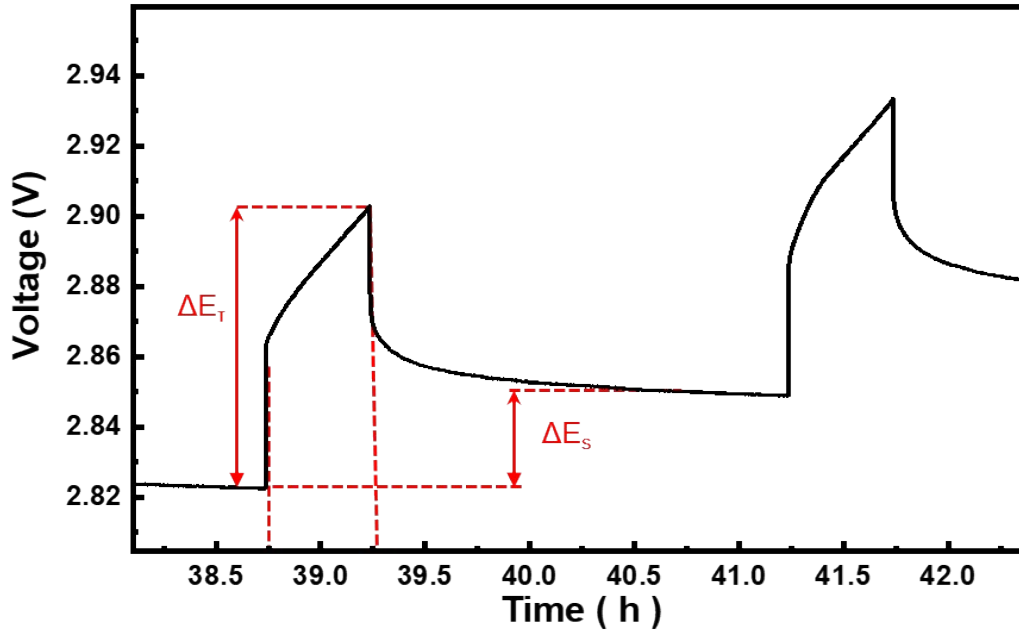

**Figure S8.** Schematic illustration of selected steps of GITT test for NFM and NFMTS with a charge/discharge time of 30 min and a relaxation time of 2 h.

GITT measurements were performed by charging at a current density of 0.1 C for 30 min following a 120 min open circuit relaxation.  $D_{Na^+}$  from GITT results is calculated by the following equation:

$$D_{Na^+} = \frac{4}{\pi\tau} \left( \frac{m_B V_M}{M_B S} \right)^2 \left( \frac{\Delta E_S}{\Delta E_T} \right)^2 \quad (S1)$$

In the above equations,  $D$  represents the diffusion coefficient of  $Na^+$  in the cathode,  $V_M$  ( $cm^3 mol^{-1}$ ) denotes the molar volume,  $m_B$  and  $M_B$  refer to the molecular weight and relative molar weight of the cathode material.  $S$  represents the surface area of the electrode.  $\tau$  represents the time duration of the applied current during galvanostatic intermittent titration.  $\Delta E_S$  and  $\Delta E_T$  represent the steady voltage state and the overall

variation in battery voltage  $E$  during the current pulse, respectively.

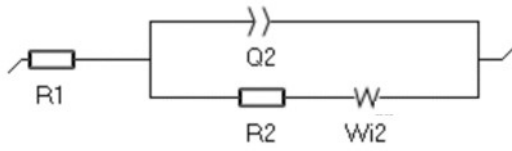

**Figure S9.** Equivalent circuit diagram in EIS
